# Supplementary material for: Phage-Based Biosensing for Rapid and Specific Detection of Staphylococcus aureus
Source: MDPI journal article supplement (doi:10.3390/microorganisms11082098), 2023-08-17
Supplement: s1 [file s1]

**Table S2** The optimal multiplicity of infection (MOI) of phage LSA2302.

| Phage concentration<br>(PFU/mL) | Bacterial concentration<br>(CFU/mL) | Multiplicity of<br>infection (MOI) | Titer<br>(PFU/mL)  |
|---------------------------------|-------------------------------------|------------------------------------|--------------------|
| $10^4$                          | $10^6$                              | 0.01                               | $1.3 \times 10^8$  |
| $10^5$                          | $10^6$                              | 0.1                                | $1.4 \times 10^8$  |
| $10^6$                          | $10^6$                              | 1                                  | $1.6 \times 10^8$  |
| $10^7$                          | $10^6$                              | 10                                 | $3.05 \times 10^8$ |
| $10^8$                          | $10^6$                              | 100                                | $2.75 \times 10^8$ |
