# Supplementary material for: Phage-Based Biosensing for Rapid and Specific Detection of Staphylococcus aureus
Source: MDPI journal article supplement (doi:10.3390/microorganisms11082098), 2023-08-17
Supplement: s1 [file s1]

**Table S4** Predicted ORFs in the phage LSA2302 genome.

| ORF | Start | Stop  | Strand | Predicted molecular function                     |
|-----|-------|-------|--------|--------------------------------------------------|
| 1   | 293   | 72    | -      | hypothetical protein                             |
| 2   | 1165  | 785   | -      | hypothetical protein                             |
| 3   | 1588  | 1265  | -      | TreP                                             |
| 4   | 1912  | 1754  | -      | TreN                                             |
| 5   | 2637  | 2446  | -      | terminal repeat-encoded protein                  |
| 6   | 2974  | 2687  | -      | TreK                                             |
| 7   | 3488  | 3180  | -      | TreJ                                             |
| 8   | 3942  | 4226  | +      | hypothetical protein                             |
| 9   | 5357  | 5121  | -      | hypothetical protein                             |
| 10  | 5693  | 5445  | -      | hypothetical protein                             |
| 11  | 5876  | 5694  | -      | TreE                                             |
| 12  | 6280  | 5987  | -      | terminal repeat-encoded protein                  |
| 13  | 6699  | 6391  | -      | hypothetical protein                             |
| 14  | 6990  | 6700  | -      | TreC                                             |
| 15  | 7284  | 7111  | -      | membrane protein                                 |
| 16  | 7574  | 7281  | -      | TreA                                             |
| 17  | 8437  | 7775  | -      | hypothetical protein                             |
| 18  | 8797  | 8483  | -      | hypothetical protein                             |
| 19  | 9423  | 9322  | -      | hypothetical protein                             |
| 20  | 9627  | 9460  | -      | hypothetical protein                             |
| 21  | 9964  | 9689  | -      | hypothetical protein                             |
| 22  | 10220 | 10002 | -      | hypothetical protein                             |
| 23  | 10555 | 10220 | -      | hypothetical protein                             |
| 24  | 10713 | 10552 | -      | hypothetical protein                             |
| 25  | 10942 | 10703 | -      | hypothetical protein                             |
| 26  | 11241 | 10942 | -      | hypothetical protein                             |
| 27  | 11558 | 11247 | -      | hypothetical protein                             |
| 28  | 11821 | 11624 | -      | hypothetical protein                             |
| 29  | 12215 | 11823 | -      | hypothetical protein                             |
| 30  | 12480 | 12235 | -      | hypothetical protein                             |
| 31  | 14028 | 12559 | -      | putative nicotinamide phosphoribosyl transferase |
| 32  | 14954 | 14046 | -      | putative ribose-phosphate pyrophosphokinase      |
| 33  | 15244 | 14951 | -      | hypothetical protein                             |
| 34  | 15627 | 15337 | -      | hypothetical protein                             |
| 35  | 15828 | 15628 | -      | hypothetical protein                             |
| 36  | 16065 | 15841 | -      | hypothetical protein                             |
| 37  | 16239 | 16081 | -      | putative membrane protei                         |
| 38  | 16458 | 16255 | -      | hypothetical protein                             |
| 39  | 17189 | 16536 | -      | hypothetical protein                             |
| 40  | 17507 | 17190 | -      | hypothetical protein                             |
| 41  | 17773 | 17510 | -      | hypothetical protein                             |

|    |       |          |   |                                                                  |
|----|-------|----------|---|------------------------------------------------------------------|
| 42 | 17967 | 17788    | - | hypothetical protein                                             |
| 43 | 18324 | 18013    | - | hypothetical protein                                             |
| 44 | 18832 | 18305    | - | metallophosphatase                                               |
| 45 | 19065 | 18829    | - | hypothetical protein                                             |
| 46 | 19483 | 19076    | - | hypothetical protein                                             |
| 47 | 19788 | 19483    | - | hypothetical protein                                             |
| 48 | 20133 | 19864    | - | hypothetical protein                                             |
| 49 | 20239 | 20126    | - | hypothetical protein                                             |
| 50 | 20537 | 20250    | - | hypothetical protein                                             |
| 51 | 20847 | 20554    | - | hypothetical protein                                             |
| 52 | 21259 | 20849    | - | putative membrane protein                                        |
| 53 | 21664 | 21485    | - | hypothetical protein                                             |
| 54 | 22280 | 21678    | - | hypothetical protein                                             |
| 55 | 22630 | 22280    | - | hypothetical protein                                             |
| 56 | 22950 | 22645    | - | hypothetical protein                                             |
| 57 | 23298 | LSA23020 | - | putative membrane protein                                        |
| 58 | 23645 | 23298    | - | hypothetical protein                                             |
| 59 | 24026 | 23658    | - | hypothetical protein                                             |
| 60 | 24221 | 24039    | - | putative membrane protein                                        |
| 61 | 24565 | 24269    | - | hypothetical protein                                             |
| 62 | 24734 | 24558    | - | hypothetical protein                                             |
| 63 | 24994 | 24746    | - | hypothetical protein                                             |
| 64 | 25654 | 25010    | - | ribulose-1,5-bisphosphate carboxylase/oxygenase<br>small subunit |
| 65 | 25968 | 25735    | - | hypothetical protein                                             |
| 66 | 26212 | 25961    | - | hypothetical protein                                             |
| 67 | 26378 | 26202    | - | hypothetical protein                                             |
| 68 | 26971 | 26414    | - | hypothetical protein                                             |
| 69 | 27218 | 26976    | - | hypothetical protein                                             |
| 70 | 27763 | 27365    | - | putative membrane protein                                        |
| 71 | 28529 | 27825    | - | hypothetical protein                                             |
| 72 | 28989 | 28546    | - | hypothetical protein                                             |
| 73 | 29512 | 29054    | - | hypothetical protein                                             |
| 74 | 30261 | 29530    | - | hypothetical protein                                             |
| 75 | 31496 | 30633    | - | hypothetical protein                                             |
| 76 | 31942 | 31496    | - | hypothetical protein                                             |
| 77 | 32687 | 31920    | - | hypothetical protein                                             |
| 78 | 33216 | 32680    | - | hypothetical protein                                             |
| 79 | 33591 | 33280    | - | hypothetical protein                                             |
| 80 | 33946 | 33578    | - | membrane protein                                                 |
| 81 | 35210 | 33960    | - | putative DNA repair exonuclease                                  |
| 82 | 35958 | 35203    | - | hypothetical protein                                             |
| 83 | 36222 | 35962    | - | major tail protein                                               |
| 84 | 36544 | 36317    | - | putative major tail protein                                      |

|     |       |       |   |                                                         |
|-----|-------|-------|---|---------------------------------------------------------|
| 85  | 37071 | 36559 | - | tail protein                                            |
| 86  | 37725 | 37093 | - | putative Ig-like protein                                |
| 87  | 38515 | 37853 | - | RNA polymerase sigma facto                              |
| 88  | 38855 | 38502 | - | hypothetical protein                                    |
| 89  | 40115 | 38859 | - | putative DNA repair protein                             |
| 90  | 41446 | 40175 | - | hypothetical protein                                    |
| 91  | 42015 | 41533 | - | hypothetical protein                                    |
| 92  | 42274 | 42032 | - | hypothetical protein                                    |
| 93  | 45562 | 42344 | - | DNA polymerase I                                        |
| 94  | 45943 | 45638 | - | HU family DNA-binding protein                           |
| 95  | 46549 | 45953 | - | hypothetical protein                                    |
| 96  | 47077 | 46757 | - | thioredoxin-like protein                                |
| 97  | 47390 | 47061 | - | hypothetical protein                                    |
| 98  | 48457 | 47408 | - | ribonucleoside-diphosphate beta subunit                 |
| 99  | 50585 | 48471 | - | putative ribonucleotide reductase large subunit         |
| 100 | 50992 | 50600 | - | ribonucleotide reduction protein NrdI                   |
| 101 | 51618 | 51010 | - | resolvase                                               |
| 102 | 52057 | 51605 | - | hypothetical protein                                    |
| 103 | 52395 | 52057 | - | hypothetical protein                                    |
| 104 | 53527 | 52460 | - | DNA primase                                             |
| 105 | 54138 | 53542 | - | hypothetical protein                                    |
| 106 | 56057 | 54138 | - | recombination endonuclease                              |
| 107 | 56434 | 56057 | - | hypothetical protein                                    |
| 108 | 57459 | 56434 | - | recombination exonuclease                               |
| 109 | 57878 | 57459 | - | acetyltransferase                                       |
| 110 | 59399 | 57957 | - | helicase DnaB-like                                      |
| 111 | 61005 | 59392 | - | replication protein                                     |
| 112 | 62765 | 61017 | - | DNA helicase                                            |
| 113 | 64231 | 62855 | - | putative tail fiber protein                             |
| 114 | 64612 | 64238 | - | hypothetical protein                                    |
| 115 | 66548 | 64626 | - | capsid and scaffold protein                             |
| 116 | 66707 | 64549 | - | hypothetical protein                                    |
| 117 | 70214 | 66756 | - | adsorption-associated tail protein                      |
| 118 | 70756 | 70235 | - | baseplate wedge protein                                 |
| 119 | 73932 | 70867 | - | hypothetical protein                                    |
| 120 | 74999 | 73953 | - | baseplate J-like protein                                |
| 121 | 75718 | 75014 | - | putative baseplate protein                              |
| 122 | 76242 | 75718 | - | hypothetical protein                                    |
| 123 | 77033 | 76242 | - | hypothetical protein                                    |
| 124 | 79686 | 77140 | - | putative glycerophosphoryl diester<br>phosphodiesterase |
| 125 | 80573 | 79686 | - | peptidoglycan hydrolase                                 |
| 126 | 83013 | 80587 | - | N-acetylmuramoyl-L-alanine amidase                      |
| 127 | 87149 | 83091 | - | tail tape measure                                       |

|     |        |        |   |                           |
|-----|--------|--------|---|---------------------------|
| 128 | 87738  | 87202  | - | RNA polymerase            |
| 129 | 88240  | 87782  | - | tail tape measure protein |
| 130 | 88683  | 88372  | - | hypothetical protein      |
| 131 | 88948  | 88754  | - | hypothetical protein      |
| 132 | 89413  | 88961  | - | hypothetical protein      |
| 133 | 89596  | 89456  | - | hypothetical protein      |
| 134 | 89744  | 89586  | - | hypothetical protein      |
| 135 | 90262  | 89834  | - | tail tube protein         |
| 136 | 92098  | 90335  | - | tail sheath protein       |
| 137 | 92340  | 92125  | - | hypothetical protein      |
| 138 | 93178  | 92342  | - | hypothetical protein      |
| 139 | 93817  | 93197  | - | hypothetical protein      |
| 140 | 94695  | 93817  | - | capsid protein            |
| 141 | 95617  | 94709  | - | hypothetical protein      |
| 142 | 95926  | 95630  | - | hypothetical protein      |
| 143 | 97409  | 96018  | - | major capsid protein      |
| 144 | 98484  | 97525  | - | hypothetical protein      |
| 145 | 99276  | 98503  | - | prohead protease          |
| 146 | 101162 | 99471  | - | portal protein            |
| 147 | 101537 | 101166 | - | putative portal protein   |
| 148 | 103151 | 101982 | - | putative membrane protein |
| 149 | 103723 | 103244 | - | membrane protein          |
| 150 | 103893 | 103720 | - | hypothetical protein      |
| 151 | 104701 | 103880 | - | structural head protein   |
| 152 | 106511 | 104694 | - | terminase large subunit   |
| 153 | 106936 | 106526 | - | hypothetical protein      |
| 154 | 107211 | 106933 | - | hypothetical protein      |
| 155 | 107455 | 107189 | - | membrane protein          |
| 156 | 107716 | 107982 | - | hypothetical protein      |
| 157 | 108015 | 108341 | + | membrane protein          |
| 158 | 108354 | 108686 | + | hypothetical protein      |
| 159 | 108699 | 108908 | + | hypothetical protein      |
| 160 | 109389 | 109607 | + | hypothetical protein      |
| 161 | 111150 | 111335 | + | hypothetical protein      |
| 162 | 111420 | 111923 | + | putative holin            |
| 163 | 111923 | 113410 | + | lysin                     |
| 164 | 113524 | 113832 | + | membrane protein          |
| 165 | 113832 | 114626 | + | membrane protein          |
| 166 | 114823 | 115515 | + | putative transglycosylase |
| 167 | 115624 | 115851 | + | hypothetical protein      |
| 168 | 115854 | 116084 | + | transcriptional regulator |
| 169 | 116074 | 116715 | + | hypothetical protein      |
| 170 | 116738 | 116929 | + | hypothetical protein      |
| 171 | 116919 | 117344 | + | putative ribonuclease     |

---

|     |        |        |   |                                         |
|-----|--------|--------|---|-----------------------------------------|
| 172 | 117360 | 117974 | + | hypothetical protein                    |
| 173 | 118026 | 118766 | + | putative PhoH-related protein           |
| 174 | 118834 | 119058 | + | hypothetical protein                    |
| 175 | 119062 | 119955 | + | RNA ligase                              |
| 176 | 119948 | 120574 | + | nucleoside 2-deoxyribosyltransferase    |
| 177 | 120567 | 121145 | + | hypothetical protein                    |
| 178 | 121152 | 121325 | + | LysM motif protein                      |
| 179 | 121342 | 121605 | + | hypothetical protein                    |
| 180 | 121685 | 123736 | + | hypothetical protein                    |
| 181 | 123737 | 123898 | + | hypothetical protein                    |
| 182 | 123942 | 124130 | + | hypothetical protein                    |
| 183 | 124130 | 124432 | + | NTP pyrophosphohydrolase                |
| 184 | 124565 | 124981 | + | putative nucleotide kinase              |
| 185 | 124974 | 125300 | + | hypothetical protein                    |
| 186 | 125453 | 126571 | + | putative porphyrin biosynthetic protein |
| 187 | 126584 | 127429 | + | AAA family ATPase                       |
| 188 | 127429 | 127707 | + | putative membrane protein               |
| 189 | 127710 | 127874 | + | hypothetical protein                    |
| 190 | 127877 | 128407 | + | hypothetical protein                    |
| 191 | 128407 | 128949 | + | hypothetical protein                    |
| 192 | 128999 | 129481 | + | hypothetical protein                    |
| 193 | 129522 | 129695 | + | putative transglycosylase               |
| 194 | 129789 | 130178 | + | hypothetical protein                    |
| 195 | 130180 | 130419 | + | hypothetical protein                    |
| 196 | 130431 | 130535 | + | hypothetical protein                    |
| 197 | 130598 | 131335 | + | hypothetical protein                    |
| 198 | 131325 | 131519 | + | hypothetical protein                    |
| 199 | 131520 | 131738 | + | hypothetical protein                    |
| 200 | 131742 | 132290 | + | hypothetical protein                    |
| 201 | 133079 | 133780 | + | serine/threonine protein phosphatase    |
| 202 | 133783 | 134187 | + | hypothetical protein                    |
| 203 | 134200 | 134694 | + | GTP cyclohydrolase II                   |
| 204 | 134710 | 135141 | + | hypothetical protein                    |
| 205 | 135147 | 135605 | + | hypothetical protein                    |
| 206 | 135605 | 135859 | + | hypothetical protein                    |
| 207 | 135852 | 136337 | + | hypothetical protein                    |
| 208 | 136334 | 136525 | + | hypothetical protein                    |
| 209 | 136525 | 136779 | + | hypothetical protein                    |
| 210 | 136772 | 137326 | + | hypothetical protein                    |
| 211 | 137326 | 137736 | + | hypothetical protein                    |
| 212 | 137749 | 137994 | + | hypothetical protein                    |
| 213 | 138008 | 138256 | + | BofL                                    |
| 214 | 138346 | 138636 | + | hypothetical protein                    |
| 215 | 139125 | 138946 | - | hypothetical protein                    |

---

|     |        |        |   |                                 |
|-----|--------|--------|---|---------------------------------|
| 216 | 139479 | 139210 | - | terminal repeat-encoded protein |
| 217 | 139652 | 139479 | - | terminal repeat-encoded protein |
| 218 | 139919 | 139656 | - | hypothetical protein            |
| 219 | 140460 | 139990 | - | terminal repeat-encoded protein |
| 220 | 140776 | 140540 | - | hypothetical protein            |
| 221 | 141031 | 140867 | - | hypothetical protein            |
| 222 | 141239 | 141102 | - | hypothetical protein            |

---
