# Supplementary material for: Phage-Based Biosensing for Rapid and Specific Detection of Staphylococcus aureus
Source: MDPI journal article supplement (doi:10.3390/microorganisms11082098), 2023-08-17
Supplement: s1 [file s1]

**Table S5** The comparison of pMB-based biosensing with other previously reported methods for *Staphylococcus aureus* detection.

| Method                                                     | Linear range<br>(CFU/mL)                | LOD                      | Time              | Ref. |
|------------------------------------------------------------|-----------------------------------------|--------------------------|-------------------|------|
| Colorimetric detection                                     | $10^1$ - $10^4$                         | 0.2 CFU/mL               | 100 min           | [1]  |
| Fluorescence detection                                     | $7.22 \times 10^0$ - $1.44 \times 10^9$ | 4 CFU/mL                 | in 120 min        | [2]  |
| Dark-field light scattering imaging with plasma biosensors | \                                       | $8 \times 10^4$ CFU/mL   | 15-20 min         | [3]  |
| Phagomagnetic separation with immunoassay                  | $1.0 \times 10^4$ - $1.0 \times 10^6$   | $10^3$ CFU/mL            | in 90 min         | [4]  |
| Strand exchange amplification                              | \                                       | $10^0$ CFU/g             | 60-120 min        | [5]  |
| Magnetic separation with mPCR                              | \                                       | 100 CFU/mL               | 240 min           | [6]  |
| Magnetic separation with bioluminescence                   | $2.3 \times 10^3$ - $1.2 \times 10^7$   | $2.2 \times 10^2$ CFU/mL | in 33 min         | [7]  |
| Magnetic separation with bioluminescence                   | $1.0 \times 10^2$ - $1.0 \times 10^7$   | 33 CFU/mL                | in 70 min         | [8]  |
| Immunomagnetic with enzyme linked                          | \                                       | $4 \times 10^3$ CFU/mL   | 90 min            | [9]  |
| Magnetic with fluorescence detection                       | $1.0 \times 10^2$ - $1.0 \times 10^7$   | 70 CFU/mL                | less than 50 min  | [10] |
| Fluorescence-enhanced lateral flow biosensor               | \                                       | $5.4 \times 10^2$ CFU/mL | in 70 min         | [11] |
| Nanoflower-based ELISA method                              | $10^1$ - $10^6$                         | 6 CFU/mL                 | over 240 min      | [12] |
| Electrochemical aptasensor                                 | $10$ - $10^8$                           | 3 CFU/mL                 | 15 min            | [13] |
| Electrochemical aptasensor                                 | $1.2 \times 10^1$ - $1.2 \times 10^8$   | 1 CFU/mL                 | 30 min            | [14] |
| Immunomagnetic with colorimetric detection                 | $10$ - $10^6$                           | 2.4 CFU/mL               | about 35 min      | [15] |
| Long-period fiber grating immunosensor                     | $10^2$ - $10^7$                         | 33 CFU/mL                | 20 min            | [16] |
| Bilayer interferometry technology                          | \                                       | 13 CFU/mL                | 16 min            | [17] |
| Magnetic separation with colorimetric                      | $10^1$ - $10^6$                         | $3.0 \times 10^2$ CFU/mL | 120 min           | [18] |
| Magnetic separation with surface-enhanced Raman scattering | $7.6 \times 10^1$ - $7.6 \times 10^7$   | 1.09 CFU/mL              | 50 min            | [19] |
| Magnetic with fluorescence detection                       | $10^2$ - $10^5$                         | $2.7 \times 10^2$ CFU/mL | 80 min            | [20] |
| Magnetic with fluorescence detection                       | $3 \times 10^1$ - $3 \times 10^6$       | 30 CFU/mL                | 45 min            | [21] |
| Molecular imprinted aptasensor                             | $10^1$ - $10^7$                         | 1 CFU/mL                 | more than 110 min | [22] |

|                                                  |                                       |                           |                      |      |
|--------------------------------------------------|---------------------------------------|---------------------------|----------------------|------|
| Sandwich lateral flow assay                      | $1.0 \times 10^3$ - $1.0 \times 10^8$ | $1.0 \times 10^3$ CFU/mL  | about 40 min         | [23] |
| Phage amplification with multiplex qPCR          | $10$ - $10^8$                         | 10 CFU/mL                 | no more than 240 min | [24] |
| Sandwich ELISA                                   | \                                     | $1.4 \times 10^5$ CFU/mL  | more than 180 min    | [25] |
| CRISPR-Cas13a based bacterial detection          | $10^0$ - $10^7$                       | 1 CFU/mL                  | 4 h                  | [26] |
| High throughput colorimetric biosensor           | $10^2$ - $10^7$                       | 81 CFU/mL                 | 5.5 h                | [27] |
| Polymerase spiral reaction with visual detection | \                                     | $1.99 \times 10^3$ CFU/g  | 2 h                  | [28] |
| This work                                        | $1 \times 10^4$ - $1 \times 10^8$     | $2.43 \times 10^3$ CFU/mL | in 30 min            | \    |

## References:

1. Sun, R., et al., *Vancomycin recognition and induced-aggregation of the Au nanoparticles through freeze-thaw for foodborne pathogen Staphylococcus aureus detection*. 2022(1873-4324 (Electronic)).
2. Du, H.A.-O., et al., *Sandwich Fluorescence Detection of Foodborne Pathogen Staphylococcus aureus with CD Fluorescence Signal Amplification in Food Samples*. LID - 10.3390/foods11070945 [doi] LID - 945. 2022(2304-8158 (Print)).
3. Imai M, M.K., Tomonari H , Jumpei Uchiyama, J., et al., *Dark-Field Microscopic Detection of Bacteria using Bacteriophage-Immobilized SiO(2)@AuNP Core-Shell Nanoparticles*. 2019(1520-6882 (Electronic)).
4. Yan, C., et al., *Combining phagomagnetic separation with immunoassay for specific, fast and sensitive detection of Staphylococcus aureus*. 2017(1873-3573 (Electronic)).
5. Liu, C., et al., *Rapid and Simple Detection of Viable Foodborne Pathogen Staphylococcus aureus*. 2019(2296-2646 (Print)).
6. Bai, X., et al., *Simultaneous detection of Bacillus cereus and Staphylococcus aureus by teicoplanin functionalized magnetic beads combined with triplex PCR*. Food Control, 2022. **132**: p. 108531.
7. Fan, E., et al., *Quantification of live Gram-positive bacteria via employing artificial antibacterial peptide-coated magnetic spheres as isolation carriers*. Microchemical Journal, 2020. **154**: p. 104643.
8. Yu, J., et al., *Sensitive and rapid detection of staphylococcus aureus in milk via cell binding domain of lysin*. 2016(1873-4235 (Electronic)).
9. Yi, Z., et al., *Lysin cell-binding domain-functionalized magnetic beads for detection of Staphylococcus aureus via inhibition of fluorescence of Amplex Red/hydrogen peroxide assay by intracellular catalase*. 2019(1618-2650 (Electronic)).
10. Yi, Z., et al., *Lysin cell-binding domain-functionalized magnetic beads for detection of Staphylococcus aureus via inhibition of fluorescence of Amplex Red/hydrogen*

*peroxide assay by intracellular catalase*. Analytical and Bioanalytical Chemistry, 2019. **411**(27): p. 7177-7185.

11. Zhou, B., et al., *CRISPR/Cas12a based fluorescence-enhanced lateral flow biosensor for detection of Staphylococcus aureus*. Sensors and Actuators B: Chemical, 2022. **351**: p. 130906.
12. Yin, W., et al., *Bio-hybrid nanoarchitectonics of nanoflower-based ELISA method for the detection of Staphylococcus aureus*. Sensors and Actuators B: Chemical, 2022. **366**: p. 132005.
13. Sohoulil, E., et al., *A new electrochemical aptasensor based on gold/nitrogen-doped carbon nano-onions for the detection of Staphylococcus aureus*. Electrochimica Acta, 2022. **403**: p. 139633.
14. Ranjbar, S. and S. Shahrokhian, *Design and fabrication of an electrochemical aptasensor using Au nanoparticles/carbon nanoparticles/cellulose nanofibers nanocomposite for rapid and sensitive detection of Staphylococcus aureus*. Bioelectrochemistry, 2018. **123**: p. 70-76.
15. Liu, Y., et al., *A colorimetric sensor for Staphylococcus aureus detection based on controlled click chemical-induced aggregation of gold nanoparticles and immunomagnetic separation*. Microchimica Acta, 2022. **189**(3): p. 104.
16. Gan, W., et al., *Rapid and sensitive detection of Staphylococcus aureus by using a long-period fiber grating immunosensor coated with egg yolk antibody*. Biosensors and Bioelectronics, 2022. **199**: p. 113860.
17. Liu, X., et al., *Rapid and sensitive detection of Staphylococcus aureus using biolayer interferometry technology combined with phage lysin LysGH15*. Biosensors and Bioelectronics, 2022. **198**: p. 113799.
18. Wang, Z., et al., *An integrated system using phenylboronic acid functionalized magnetic beads and colorimetric detection for Staphylococcus aureus*. Food Control, 2022. **133**: p. 108633.
19. Qi, X., et al., *An ultrasensitive and dual-recognition SERS biosensor based on Fe<sub>3</sub>O<sub>4</sub>@Au-Teicoplanin and aptamer functionalized Au@Ag nanoparticles for detection of Staphylococcus aureus*. Talanta, 2022. **250**: p. 123648.
20. Wang, Z., et al., *A novel PEG-mediated boric acid functionalized magnetic nanomaterials based fluorescence biosensor for the detection of Staphylococcus aureus*. Microchemical Journal, 2022. **178**: p. 107379.
21. Huang, J., et al., *A Dual-Recognition Strategy for Staphylococcus aureus Detection Using Teicoplanin-Modified Magnetic Nanoparticles and IgG-Functionalized Quantum Dots*. Food Analytical Methods, 2022. **15**(7): p. 1968-1978.
22. El-Wakil, M.M., et al., *An innovative dual recognition aptasensor for specific detection of Staphylococcus aureus based on Au/Fe<sub>3</sub>O<sub>4</sub> binary hybrid*. Scientific Reports, 2022. **12**(1): p. 12502.
23. Zhao, M., et al., *Antibiotic and mammal IgG based lateral flow assay for simple and sensitive detection of Staphylococcus aureus*. Food Chemistry, 2021. **339**: p.

127955.

24. Huang, C., et al., *Dual phage amplification-mediated multiplex detection strategies for the simultaneous detection of Salmonella enterica and Staphylococcus aureus*. Talanta, 2023. **253**: p. 124095.
25. Hu, Y., et al., *Selection of specific nanobodies to develop an immuno-assay detecting Staphylococcus aureus in milk*. Food Chemistry, 2021. **353**: p. 129481.
26. Zhou, J., et al., *CRISPR-Cas13a based bacterial detection platform: Sensing pathogen Staphylococcus aureus in food samples*. Analytica Chimica Acta, 2020. **1127**: p. 225-233.
27. Yu, T., et al., *Aptamer based high throughput colorimetric biosensor for detection of staphylococcus aureus*. Scientific Reports, 2020. **10**(1): p. 9190.
28. Milton, A.A.P., et al., *Development of a novel polymerase spiral reaction (PSR) assay for rapid and visual detection of Staphylococcus aureus in meat*. LWT, 2021. **139**: p. 110507.
