# Supplementary material for: Phage-Based Biosensing for Rapid and Specific Detection of Staphylococcus aureus
Source: MDPI journal article supplement (doi:10.3390/microorganisms11082098), 2023-08-17
Supplement: s1 [file s1]

**Table S3** Genomic features of phage LSA2302.

| Features              | LSA2302 |
|-----------------------|---------|
| Genomic size (bp)     | 141325  |
| No. ORFs              | 222     |
| No. Hypothetical gene | 133     |
| G+C content (%)       | 30.20%  |
| No. tRNA              | 3       |
| No. Promoter          | 23      |
| No. Terminators       | 70      |
