# Supplementary material for: Phage-Based Biosensing for Rapid and Specific Detection of Staphylococcus aureus
Source: MDPI journal article supplement (doi:10.3390/microorganisms11082098), 2023-08-17
Supplement: s1 [file s1]

**Table S1** Bacterial strains used in this study and the host range of phage LSA2302.

| Number | G+/G- | Strains | Source            | Species                         | Lytic ability |
|--------|-------|---------|-------------------|---------------------------------|---------------|
| 1      | G+    | SA2     | Lab Collection    | <i>Staphylococcus aureus</i>    | 2             |
| 2      | G+    | SA6     | Lab Collection    | <i>Staphylococcus aureus</i>    | 2             |
| 3      | G+    | SA7     | Lab Collection    | <i>Staphylococcus aureus</i>    | 2             |
| 4      | G+    | SA8     | Lab Collection    | <i>Staphylococcus aureus</i>    | 1             |
| 5      | G+    | SA24    | Lab Collection    | <i>Staphylococcus aureus</i>    | 2             |
| 6      | G+    | SA82    | Lab Collection    | <i>Staphylococcus aureus</i>    | 2             |
| 7      | G+    | SA83    | Lab Collection    | <i>Staphylococcus aureus</i>    | 2             |
| 8      | G+    | SA84    | Lab Collection    | <i>Staphylococcus aureus</i>    | 2             |
| 9      | G+    | SA85    | Lab Collection    | <i>Staphylococcus aureus</i>    | 2             |
| 10     | G+    | SA86    | Lab Collection    | <i>Staphylococcus aureus</i>    | 2             |
| 11     | G+    | SA87    | Lab Collection    | <i>Staphylococcus aureus</i>    | 2             |
| 12     | G+    | SA88    | Lab Collection    | <i>Staphylococcus aureus</i>    | 2             |
| 13     | G+    | SA89    | Lab Collection    | <i>Staphylococcus aureus</i>    | 2             |
| 14     | G+    | SA90    | Lab Collection    | <i>Staphylococcus aureus</i>    | 0             |
| 15     | G+    | SA91    | Lab Collection    | <i>Staphylococcus aureus</i>    | 0             |
| 16     | G+    | SA92    | Lab Collection    | <i>Staphylococcus aureus</i>    | 0             |
| 17     | G+    | SA93    | Lab Collection    | <i>Staphylococcus aureus</i>    | 0             |
| 18     | G+    | SA95    | Lab Collection    | <i>Staphylococcus aureus</i>    | 0             |
| 19     | G+    | SA97    | Lab Collection    | <i>Staphylococcus aureus</i>    | 2             |
| 20     | G+    | SA99    | Lab Collection    | <i>Staphylococcus aureus</i>    | 0             |
| 21     | G+    | 29213   | ATCC <sup>a</sup> | <i>Staphylococcus aureus</i>    | 0             |
| 22     | G+    | 26003   | CMCC <sup>b</sup> | <i>Staphylococcus aureus</i>    | 2             |
| 23     | G+    | 6538    | ATCC              | <i>Staphylococcus aureus</i>    | 2             |
| 24     | G+    | 25923   | ATCC              | <i>Staphylococcus aureus</i>    | 2             |
| 25     | G+    | 196     | Lab Collection    | <i>Staphylococcus aureus</i>    | 1             |
| 26     | G+    | 142     | Lab Collection    | <i>Staphylococcus aureus</i>    | 0             |
| 27     | G+    | 165     | Lab Collection    | <i>Staphylococcus aureus</i>    | 0             |
| 28     | G-    | 12900   | ATCC              | <i>Escherichia coli</i> O157:H7 | 0             |
| 29     | G-    | 13076   | ATCC              | <i>Salmonella</i> Enteritidis   | 0             |
| 30     | G-    | 13311   | ATCC              | <i>Salmonella</i> Typhimurium   | 0             |
| 31     | G-    | 14028   | ATCC              | <i>Salmonella</i> Typhimurium   | 0             |
| 32     | G-    | 33846   | ATCC              | <i>Vibrio parahaemolyticus</i>  | 0             |
| 33     | G-    | 17802   | ATCC              | <i>Vibrio parahaemolyticus</i>  | 0             |
| 34     | G-    | 19114   | ATCC              | <i>Listeria monocytogenes</i>   | 0             |
| 35     | G-    | 10104   | CMCC              | <i>Pseudomonas aeruginosa</i>   | 0             |

2, strong intensity (Clear plaque); 1, weak intensity (Opaque plaque); 0, no lytic activity (No plaque).

ATCC <sup>a</sup>, American Type Culture Collection. CMCC <sup>b</sup>, Center for Medical Culture Collections.
